# Supplementary material for: Solid-state 1H and 13C NMR studies of new ionic plastic-crystals with branched structures: [NEtxMe(3−x)(i-Pr)][BEt(4−y)Mey] (x = 1–3, y = 0, 1)
Source: Royal Society of Chemistry journal article supplement (doi:10.1039/d4cp04064c), 2024-01-01
Supplement: d4cp04064c1.pdf [file d4cp04064c1.pdf]

## Supporting Information

### Solid-State $^1\text{H}$ and $^{13}\text{C}$ NMR Studies of New Ionic Plastic-Crystals with Branched Structures: $[\text{NEt}_x\text{Me}_{(3-x)}(i\text{-Pr})][\text{BEt}_{(4-y)}\text{Me}_y]$ ( $x = 1\text{--}3$ , $y = 0, 1$ )

Katsuumi Nagai, Yuuna Okubo and Hisashi Honda\*

Graduate School of Nanobioscience, Yokohama City University, Kanazawa-ku, Yokohama, 236-0027

Table S1 Melting ( $T_{\text{mp}}$ ) and phase transition temperatures of some alkylammonium salts with the  $\text{BEt}_3\text{Me}$  and  $\text{BEt}_4$  anions. Here, symbols of  $T_{\text{R}}$  and  $T_{\text{P}}$  are transition temperatures from solid to rotator and plastic phases, respectively.  $M_{\text{w}}$  is molecular weight of the cations.

|                                                        | $M_{\text{w}}$ | $\text{BEt}_3\text{Me}$ |                |                 | $\text{BEt}_4$ |                |                 |
|--------------------------------------------------------|----------------|-------------------------|----------------|-----------------|----------------|----------------|-----------------|
|                                                        |                | $T_{\text{R}}$          | $T_{\text{P}}$ | $T_{\text{mp}}$ | $T_{\text{R}}$ | $T_{\text{P}}$ | $T_{\text{mp}}$ |
| $\text{NMe}_4^*$                                       | 74             | -                       | 252.6          | dec.            | -              | 333            | dec.            |
| $\text{NEtMe}_3^*$                                     | 88             | -                       | 239.8          | dec.            | -              | 278            | dec.            |
| $\text{NEt}_2\text{Me}_2^*$                            | 102            | -                       | -              | dec.            | -              | 242            | dec.            |
| <b><math>\text{NMe}_3(i\text{-Pr})</math></b>          | <b>102</b>     | <b>-</b>                | <b>227</b>     | <b>dec.</b>     | <b>-</b>       | <b>271</b>     | <b>dec.</b>     |
| $\text{NEt}_3\text{Me}^*$                              | 116            | -                       | -              | dec.            | -              | 238            | dec.            |
| $\text{NEtMe}_2\text{Pr}^{**}$                         | 116            | 267                     | 325            | 355             | 253            | -              | 345             |
| <b><math>\text{NEtMe}_2(i\text{-Pr})</math></b>        | <b>116</b>     | <b>-</b>                | <b>197</b>     | <b>dec.</b>     | <b>-</b>       | <b>242</b>     | <b>dec.</b>     |
| $\text{NEt}_4^*$                                       | 130            | -                       | 233.4          | dec.            | -              | 295            | dec.            |
| $\text{NEt}_2\text{MePr}^{**}$                         | 130            | 240                     | 322            | 370             | 235            | -              | 325             |
| $\text{NEtMe}_2\text{Bu}^{**}$                         | 130            | 202                     | -              | 326             | 210            | -              | 320             |
| <b><math>\text{NEt}_2\text{Me}(i\text{-Pr})</math></b> | <b>130</b>     | <b>-</b>                | <b>-</b>       | <b>dec.</b>     | <b>-</b>       | <b>235</b>     | <b>dec.</b>     |
| $\text{NEt}_3\text{Pr}^*$                              | 144            | -                       | 243.3          | 391.2           | 341            | -              | 363             |
| $\text{NEt}_2\text{MeBu}^{**}$                         | 144            | 222                     | -              | 310             | -              | -              | 303             |
| <b><math>\text{NEt}_3(i\text{-Pr})</math></b>          | <b>144</b>     | <b>-</b>                | <b>184</b>     | <b>dec.</b>     | <b>-</b>       | <b>245</b>     | <b>dec.</b>     |
| $\text{NEt}_2\text{Pr}_2^*$                            | 158            | 269.1                   | -              | 358.7           | 341            | -              | 361             |
| $\text{NEtPr}_3^*$                                     | 172            | 328.4                   | -              | 359.3           | 358            | -              | 366             |
| $\text{NPr}_4^*$                                       | 186            | -                       | -              | 377.9           | -              | -              | 388             |
| $\text{NBu}_4^*$                                       | 242            | -                       | -              | 423.7           | -              | -              | 418             |

Data of \* and \*\* are employed in reference [6, 37, 38, 40, 41].

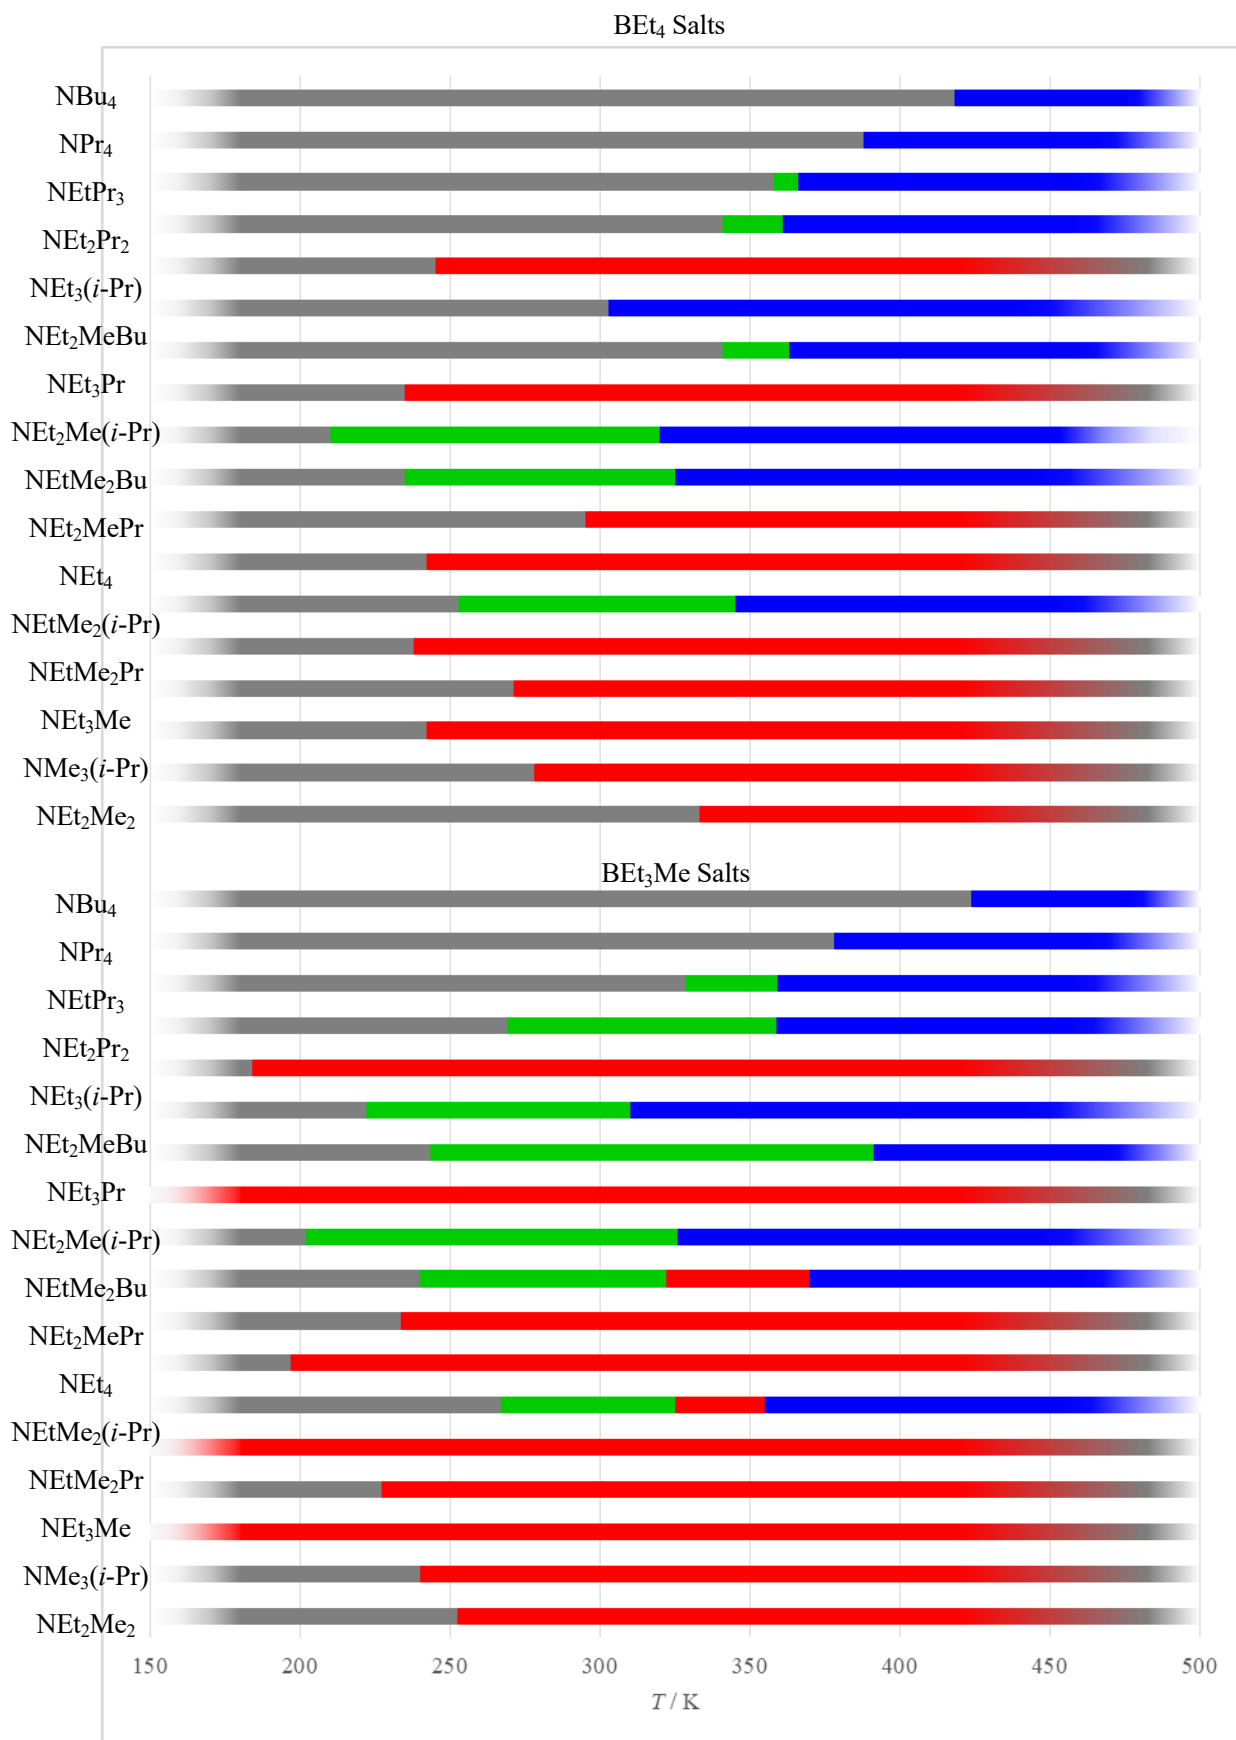

Figure S1 Phase transition temperatures. Gray, green, red, and blue lines are ordinal crystal, rotator,

plastic, and liquid phases, respectively. In this figure, the values listed in [Table S1](#) are employed.

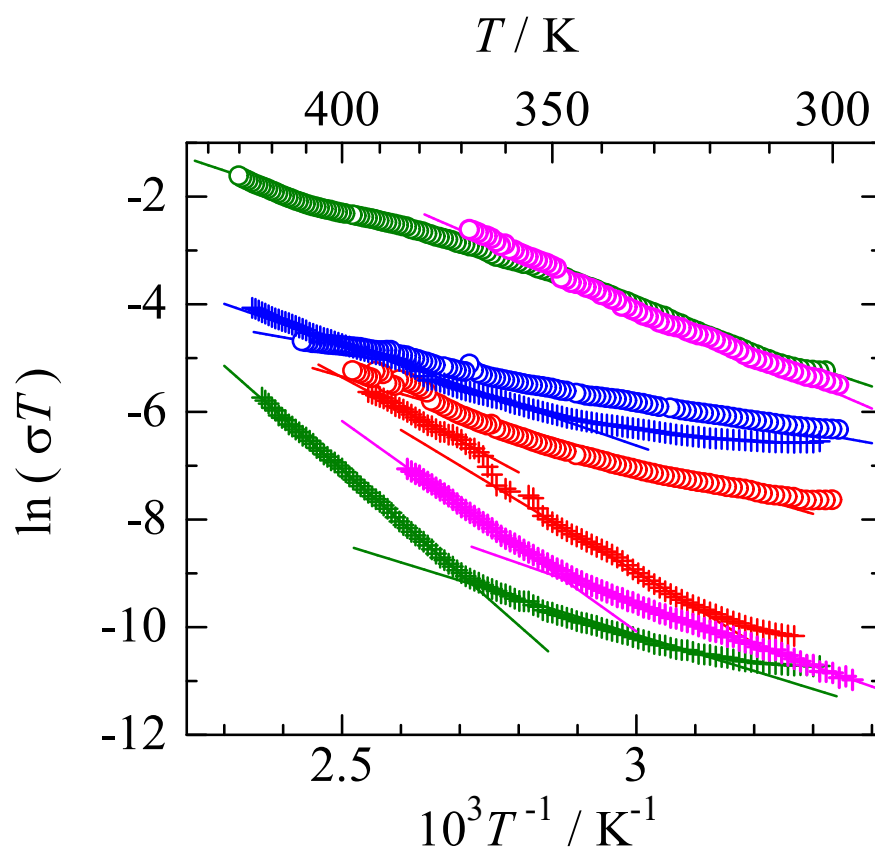

Figure S2 Arrhenius plots of electrical conductivity.

[NMe<sub>3</sub>(*i*-Pr)][BEt<sub>3</sub>Me] (○), [NEtMe<sub>2</sub>(*i*-Pr)][BEt<sub>3</sub>Me] (⊙), [NEt<sub>2</sub>Me(*i*-Pr)][BEt<sub>3</sub>Me] (⊚), [NEt<sub>3</sub>(*i*-Pr)][BEt<sub>3</sub>Me] (⊛), [NMe<sub>3</sub>(*i*-Pr)][BEt<sub>4</sub>] (+), [NEtMe<sub>2</sub>(*i*-Pr)][BEt<sub>4</sub>] (+), [NEt<sub>2</sub>Me(*i*-Pr)][BEt<sub>4</sub>] (+), [NEt<sub>3</sub>(*i*-Pr)][BEt<sub>4</sub>] (+)
